# Supplementary material for: Reduced mineralization potential of osteoblasts in adolescent idiopathic scoliosis: intrinsic dysfunction and crosstalk with TLR-activated chondrocytes
Source: Research Square preprint supplement (doi:10.21203/rs.3.rs-7602845/v1), 2025-10-12
Supplement: Supplementary file 1 [file 032be417ee46f5c461a8f77b.xlsx]

## Sheet: Table 2
Gene name	Catlog number
SP7(osterix)	Hs01866874_s1
RUNX2	Hs01047973_m1
ALPL(alkaline phosphatase)	Hs01029144_m1
BGLAP(osteocalcin)	Hs01587814_g1
OPN(osteopontin)	Hs00959010_m1
BSP(bone sialoprotein)	Hs00913377_m1
SOST(sclerostin)	Hs00228830_m1
DMP1	Hs01009391_g1
CD99	Hs05624810_g1
HOXD10	Hs00157974_m1
COL1A1	hs00164004_m1
IL-1a	Hs00174092_m1
IL-1b	Hs01555410_m1
IL-6	Hs00174131_m1
TLR-4	Hs00152939_m1
TLR-7	Hs01933259_s1
TLR-1	Hs00413978_m1
TLR-2	Hs02621280_s1
TLR-6	Hs01039989_s1
CXCL-10	Hs00171042_m1
CXCL-12	Hs03676656_mH
CXCL-6	Hs00605742_g1
ACTIN	hs01060665_g1
18S	Hs03003631_g1
