# Supplementary material for: Reduced mineralization potential of osteoblasts in adolescent idiopathic scoliosis: intrinsic dysfunction and crosstalk with TLR-activated chondrocytes
Source: Research Square preprint supplement (doi:10.21203/rs.3.rs-7602845/v1), 2025-10-12
Supplement: Supplementary file 2 [file 148fc7336f6ab1dc0718dee8.xlsx]

## Sheet: Table 1
Sample ID	Sex	Age	COD	Apex of Curve	Lenke Type	Primary cobb angle	E1	E2	E3	E4	E5	E6
NSC1	Male	16	Overdose	/	/	/	✔
NSC2	Male	20	Motor vehicle accident	/	/	/	✔
NSC3	Male	19	Overdose	/	/	/	✔
NSC4	Male	16	Overdose	/	/	/		✔
NSC5	Male	19	Anoxia	/	/	/		✔
NSC6	Male	31	Myocardial infarction	/	/	/		✔
NSC7	Male	22	Anoxia	/	/	/		✔
NSC8	Female	20	Motor vehicle accident	/	/	/		✔
NSC9	Male	31	Cerebrovascular accident	/	/	/		✔
NSC10	Male	42	Anoxia	/	/	/		✔	✔	✔
NSC11	Male	40	Anoxia	/	/	/		✔	✔	✔
NSC12	Male	19	Overdose	/	/	/		✔	✔	✔
NSC13	Female	39	Anoxia	/	/	/			✔	✔
NSC14	Female	20	Cerebrovascular accident	/	/	/			✔	✔
NSC15	Female	27	Motor vehicle accident	/	/	/			✔	✔
NSC16	Male	21	Anoxia	/	/	/			✔	✔
NSC17	Male	28	Anoxia	/	/	/			✔	✔
NSC18	Male	31	Cerebrovascular accident	/	/	/			✔	✔
NSC19	Male	34	Motor vehicle accident	/	/	/			✔	✔
AIS1	Female	14	/	T9	1	67	✔
AIS2	Female	16	/	T8	1	55	✔
AIS3	Male	15	/	T8	1	60	✔
AIS4	Female	15	/	T6	1	66		✔
AIS5	Female	18	/	T8	1	52		✔
AIS6	Female	14	/	T10	1	56		✔
AIS7	Male	18	/	T8	4	75		✔
AIS8	Female	16	/	T8	1	50		✔
AIS9	Male	19	/	T8	1	53		✔
AIS10	Female	17	/	T8	1	50		✔
AIS11	Female	19	/	T9	1	48		✔
AIS12	Female	19	/	T7	1	55		✔
AIS13	Male	16	/	T8	1	55		✔
AIS14	Female	16	/	T8	2	80		✔
AIS15	Female	16	/	T8	1	46		✔
AIS16	Female	15	/	T9	1	60		✔
AIS17	Female	19	/	T8	1	54		✔
AIS18	Female	16	/	T7	3	54		✔
AIS19	Female	12	/	T8	1	56		✔
AIS20	Female	15	/	T11	1	56		✔
AIS21	Female	12	/	T8	2	80		✔
AIS22	Female	N/A		N/A	N/A	N/A		✔
AIS23	Female	14	/	T8	4	90		✔
AIS24	Female	18	/	T12	5	50		✔
AIS25	Female	18	/	T8	1	50		✔
AIS26	Female	15	/	T8	1	60		✔
AIS27	Male	14	/	T7	3	55		✔
AIS28	Male	19	/	T9	1	50		✔
AIS29	Female	15	/	T9	3	55		✔
AIS30	Male	17	/	T8	2	65		✔
AIS31	Female	14	/	T9	1	67		✔
AIS32	Female	16	/	T8	1	55		✔
AIS33	Female	17	/	T8	1	60		✔
AIS34	Male	15	/	T8	1	60		✔
AIS35	Female	16	/	T8	1	75			✔	✔
AIS36	Female	18	/	L1	1	45			✔	✔
AIS37	Female	14	/	T8	1	67			✔	✔
AIS38	Female	15	/	T9	1	50			✔	✔
AIS39	Female	20	/	T8	2	55			✔	✔
AIS40	Male	15	/	T10	5	55			✔	E4
AIS41	Female	12	/	L2	6	60			✔	✔
AIS42	Female	19	/	L2	5	50			✔	✔
AIS43	Female	15	/	L1	5	65			✔	✔
AIS44	Female	21	/	T8	1	50			✔	✔
AIS45	Female	14	/	T10	2	55						✔
AIS46	Female	16	/	T10	2	55					✔	✔
AIS47	Male	18	/	T8	2	48						✔
AIS48	Female	14	/	T10	2	55						✔
AIS49	Female	14	/	T10	2	55						✔
AIS50	Female	15	/	T8	2	65					✔
AIS51	Female	16	/	T9	1	55					✔
AIS52	Female	18	/	T8	2	45					✔
AIS53	Female	17	/	T8	2	48					✔
E1	RNA-seq
E2	Validation of RNA-seq DEGs by qPCR (Baseline, Untreated)
E3	Mineralization(NSC vs AIS)
E4	Expression of bone marker genes by qPCR (Post-Mineralization Stimulation)
E5	Osteoblasts (Co-culture)
E6	Osteoblasts (CM treatment)
